# Supplementary material for: Linking Energy Poverty with Thermal Building Regulations and Energy Efficiency Policies in Portugal
Source: MDPI journal article supplement (doi:10.3390/en15010329), 2022-01-04
Supplement: s1 [file s1]

Archive with 1 entries (1 files):
- energies-1459364-supplementary.pdf
