# Supplementary material for: Linking Energy Poverty with Thermal Building Regulations and Energy Efficiency Policies in Portugal
Source: MDPI journal article supplement (doi:10.3390/en15010329), 2022-01-04
Supplement: s1 [file s1 › energies-1459364-supplementary.pdf]

## Supplementary Data

**Table S1** - Timeline of key legislations and actions on the topic of EP in EU (non-exhaustive list).

| Year | Regulation/action                                                                                                                                                       | Legal reference document                       |
|------|-------------------------------------------------------------------------------------------------------------------------------------------------------------------------|------------------------------------------------|
| 1991 | First EP definition (UK)                                                                                                                                                | -                                              |
| 1993 | Limit carbon dioxide emissions by improving energy efficiency (SAVE)                                                                                                    | Directive 93/76/CEE                            |
| 2002 | EPBD                                                                                                                                                                    | Directive 2002/91/EC                           |
| 2003 | Regulation for the internal market in electricity (repealing Directive 96/92/EC)<br>Rules for the internal market in natural gas (repealing Directive 98/30/EC)         | Directive 2003/54/EC<br>Directive 2003/55/EC   |
| 2006 | Energy end-use efficiency and energy services (repealing Council Directive 93/76/EEC)                                                                                   | Directive 2006/32/EC                           |
| 2007 | Second energy package                                                                                                                                                   |                                                |
| 2009 | Regulation for the internal market in electricity (repealing Directive 2003/54/EC)<br>Regaltion for the internal market in natural gas (repealing Directive 2003/55/EC) | Directive 2009/72/EC<br>Directive 2009/73/EC   |
| 2010 | Regulation for labelling and standard product information concerning energy consumption and other resources by energy-related products                                  | Directive 2010/30/EU                           |
| 2010 | EPBD recast                                                                                                                                                             | Directive 2010/31/EU                           |
| 2012 | Energy efficiency Directive, amending Directives 2009/125/EC and 2010/30/EU (repealing Directives 2004/8/EC and 2006/32/EC)                                             | Directive 2012/27/EU                           |
| 2012 | LIHC definition                                                                                                                                                         | -                                              |
| 2015 | Third Energy package                                                                                                                                                    | -                                              |
| 2015 | Energy Union                                                                                                                                                            | -                                              |
| 2016 | Clean Energy for All                                                                                                                                                    | -                                              |
| 2016 | Vulnerable Consumer Working Group in 2016                                                                                                                               | -                                              |
| 2018 | EPOV                                                                                                                                                                    | -                                              |
| 2018 | Amending Directive 2010/31/EU on the energy performance of buildings and Directive 2012/27/EU on energy efficiency                                                      | Directive 2018/844/EU                          |
| 2020 | National Energy and Climate Plan (Portugal)                                                                                                                             | Council of Ministers<br>Resolution n.º 53/2020 |
| 2021 | Long-Term Strategy for the Renovation of Buildings (ELPRE)                                                                                                              | Ministers Council<br>Resolution No. 8-A/2021   |

**Table S2** - Measures adopted in Portugal to tackle EP directly or indirectly.

| Measure                                              | Source                                   | Objective                                                                                                                                                                                                                | Scale    | Years(s)                                                 | Funding/Beneficiaries                                                 |
|------------------------------------------------------|------------------------------------------|--------------------------------------------------------------------------------------------------------------------------------------------------------------------------------------------------------------------------|----------|----------------------------------------------------------|-----------------------------------------------------------------------|
| <i>Consumer protection measures</i>                  |                                          |                                                                                                                                                                                                                          |          |                                                          |                                                                       |
| Social Tariff                                        | Government                               | Special price (reduced) of electrical energy and natural gas for specific groups considered vulnerable consumers.                                                                                                        | National | Since 2010, revised in 2014 and 2016                     | 800 000 households in 2016 (14% of residential electricity consumers) |
| Extraordinary Social Support                         | Government                               | Extraordinary and temporary reduced electricity and natural gas bill associated with the increase in electricity consumption during a specific season (ex. winter months) or situation (ex. quarantine due to COVID-19). | National | Since 2011, revised in 2014 to comply with social tariff | 35 000 households in 2016 (2.57% of natural gas consumers)            |
| <i>Energy savings</i>                                |                                          |                                                                                                                                                                                                                          |          |                                                          |                                                                       |
| Electrical Energy Consumption Efficiency             | Regulatory Authority for Energy Services | Improve the efficiency and reduce the electricity consumption with house level interventions (window replacement, solar thermal systems installation, wall, pavements and roofs insulation, among others)                |          | 2012, 2015, 2018                                         | 4.6k€                                                                 |
| Electricity generation from RES for self-consumption | Government                               | Electricity generation, for own use in the location associated with the respective producing unit,                                                                                                                       | National | 2012, 2014                                               |                                                                       |

|                                                                                                 |            |                                                                                                                                                                                                                 |                                                                      |            |                         |
|-------------------------------------------------------------------------------------------------|------------|-----------------------------------------------------------------------------------------------------------------------------------------------------------------------------------------------------------------|----------------------------------------------------------------------|------------|-------------------------|
|                                                                                                 |            | with or without connection to the grid supported on RES.                                                                                                                                                        |                                                                      |            |                         |
| Improved Comfort in Vulnerable Households                                                       | Municipal  | Improvement of the housing conditions providing more comfort of vulnerable households.                                                                                                                          | Mainland Portugal, especially inland areas with more elderly people. | 2007, 2014 |                         |
| Integrated Action Plans for Disadvantaged Communities (PAICD) & Energy efficiency (EE) measures | Government | Physical, social and economic regeneration of social neighbourhoods (designated territories of disadvantaged communities). Also, interventions in buildings to improve energy efficiency and use of RES.        | Social neighbourhoods within municipalities                          | 2017       | 16k € (1632 households) |
| Instrument for the Urban Rehabilitation and Revitalization (IFRRU 2020)                         | Government | Financial options with special favourable terms, developed to support urban rehabilitation and energy efficiency, mainly for social housing.                                                                    | National                                                             | 2015–2023  | 252 billion €           |
| Efficient House                                                                                 | Government | Improve the energy efficiency of the housing stock;<br>Promote the use of renewable energy;<br>Improve the water efficiency of the housing stock;<br>Optimize solid urban waste management;<br>Remove materials | National                                                             | 2018-2021  | 200M €                  |

|                                                  |            |                                                                                                                                                          |          |           |              |
|--------------------------------------------------|------------|----------------------------------------------------------------------------------------------------------------------------------------------------------|----------|-----------|--------------|
|                                                  |            | harmful to health and the environment;<br>Increase the quality of the building and its habitability;<br>Encourage environmentally responsible behaviour. |          |           |              |
| Support Programme for More Sustainable Buildings | Government | Improve energy efficiency though, namely, to improve water efficiency and to promote the circular economy in buildings.                                  | National | 2020-2021 | €4.5 million |
